# Supplementary material
Source: PubMed Central journal article supplement (PMC6462403)
Supplement: NIHMS1019079-supplement-1.pdf [file NIHMS1019079-supplement-1.pdf]

Developmental Cell, Volume 48

## Supplemental Information

### **SPOP Promotes Nanog Destruction to Suppress**

### **Stem Cell Traits and Prostate Cancer Progression**

**Jinfang Zhang, Ming Chen, Yasheng Zhu, Xiangpeng Dai, Fabin Dang, Junming Ren, Shancheng Ren, Yulia V. Shulga, Francisco Beca, Wenjian Gan, Fei Wu, Yu-Min Lin, Xiaobo Zhou, James A. DeCaprio, Andrew H. Beck, Kun Ping Lu, Jiaoti Huang, Cheryl Zhao, Yinghao Sun, Xu Gao, Pier Paolo Pandolfi, and Wenyi Wei**

## **Supplemental Information**

### **SPOP promotes Nanog destruction to suppress stem cell traits and prostate cancer progression**

Jinfang Zhang<sup>1,2</sup>, Ming Chen<sup>2,9,12</sup>, Yasheng Zhu<sup>3,12</sup>, Xiangpeng Dai<sup>1</sup>, Fabin Dang<sup>1</sup>, Junming Ren<sup>1</sup>, Shancheng Ren<sup>3</sup>, Yulia V. Shulga<sup>2</sup>, Francisco Beca<sup>1,11</sup>, Wenjian Gan<sup>1</sup>, Fei Wu<sup>1,4</sup>, Yu-Min Lin<sup>5</sup>, Xiaobo Zhou<sup>6,7</sup>, James A. DeCaprio<sup>8</sup>, Andrew H. Beck<sup>1</sup>, Kun Ping Lu<sup>5</sup>, Jiaoti Huang<sup>9</sup>, Cheryl Zhao<sup>10</sup>, Yinghao Sun<sup>3</sup>, Xu Gao<sup>3,\*</sup>, Pier Paolo Pandolfi<sup>2,\*</sup>, Wenyi Wei<sup>1,13\*</sup>

#### **SUPPLEMENTAL SECTION INVENTORY**

**Figure S1, related to manuscript Figure 1.**

**Figure S2, related to manuscript Figure 2.**

**Figure S3, related to manuscript Figure 3.**

**Figure S4, related to manuscript Figure 4.**

**Figure S5, related to manuscript Figure 5.**

**Figure S6, related to manuscript Figure 6.**

**Table S1, related to STAR★METHODS.**

**Figure S1**

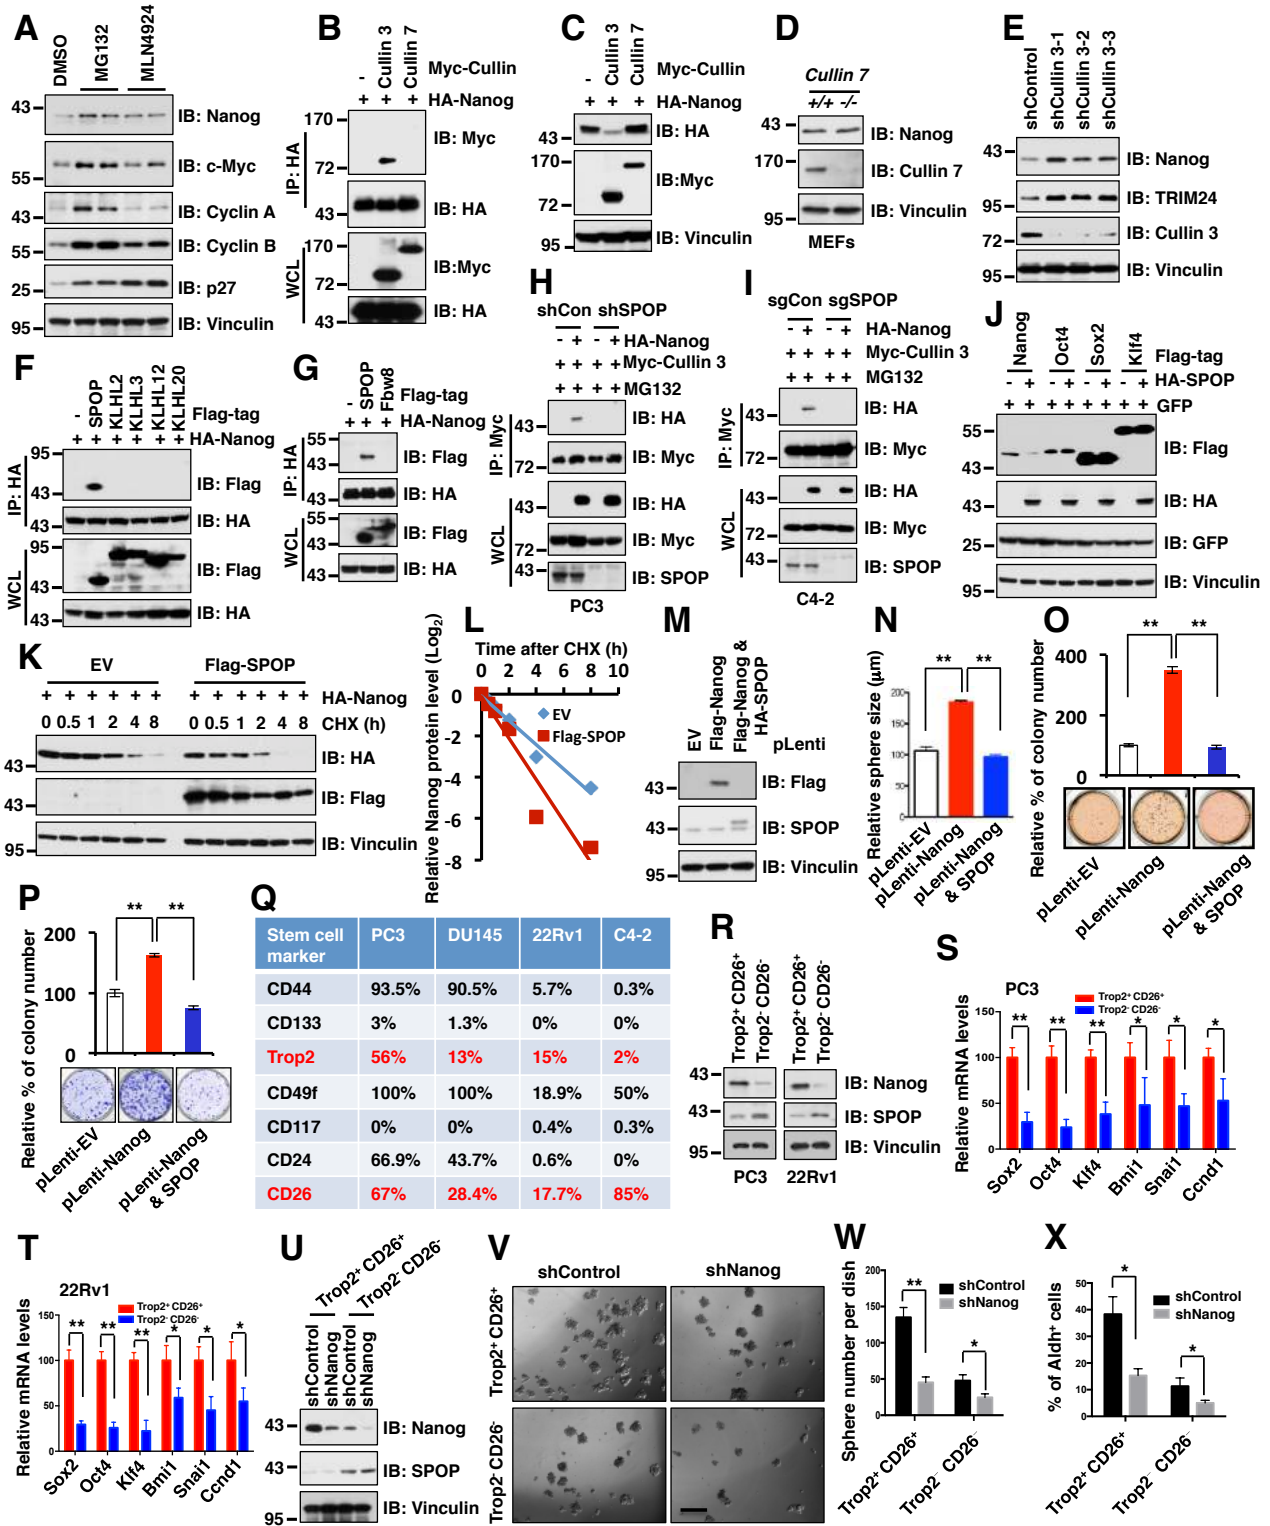

**Figure S1: Cullin 3<sup>SPOP</sup> suppresses prostate cancer stem cell traits largely through promoting Nanog poly-ubiquitination and degradation (related to Figure 1).**

- A.** Immunoblot (IB) analysis of whole cell lysates (WCL) derived from DU145 cells with indicated antibodies. Where indicated, cells were treated with MG132 (10  $\mu$ M) or MLN4924 (1  $\mu$ M) for 12 hours (h) before harvesting.
- B.** IB analysis of WCL and anti-HA immunoprecipitates (IP) derived from 293T cells transfected with indicated constructs.
- C.** IB analysis of WCL derived from 293T cells transfected with indicated constructs.
- D.** IB analysis of WCL derived from *Cullin 7<sup>+/+</sup>* and *Cullin 7<sup>-/-</sup>* MEFs.
- E.** IB analysis of WCL derived from DU145 cells infected with the indicated lentiviral shRNAs against *Cullin 3* and selected with puromycin (1  $\mu$ g/ml) for 3 days.
- F-G.** IB analysis of WCL and anti-HA immunoprecipitations (IP) derived from 293T cells transfected with indicated constructs.
- H-I.** IB analysis of WCL and anti-Myc IP derived from PC3 or C4-2 cells stably expressing shSPOP or sgSPOP to deplete endogenous *SPOP*. Cells were treated with MG132 (30  $\mu$ M) for 6 h before harvesting.
- J.** IB analysis of WCL derived from 293T cells transfected with indicated constructs.
- K-L.** IB analysis of WCL derived from 293T cells transfected with indicated constructs. 36 h post transfection, cells were treated with 100  $\mu$ g/ml cycloheximide (CHX) as indicated time points. Nanog protein abundance in (**K**) was quantified by ImageJ and plotted in (**L**).
- M.** IB analysis of WCL derived from PC3 cells infected with the indicated lentiviral constructs and selected with Hygromycin B (100  $\mu$ g/ml) for 3 days.
- N.** Quantification of sphere size in **Figure 1K** was showed. Data were presented as mean  $\pm$  S.D. (n=3).  $^{*}p<0.01$  (*t*-test).
- O.** Representative images and quantification of soft agar assays for PC3 cells stably expressing indicated constructs was showed. Data were presented as mean  $\pm$  S.D. (n=3).  $^{*}p<0.01$  (*t*-test).
- P.** Representative images and quantification of colony formation assays for PC3 cells stably expressing indicated constructs were shown. Data were presented as mean  $\pm$  S.D. (n=3).  $^{*}p<0.01$  (*t*-test).
- Q.** Summary for FACS results to show different stem cell maker positive cells in various prostate cancer cells including PC3, DU145, 22Rv1 and C4-2.
- R.** IB analysis of WCL derived from Trop2<sup>+</sup>CD26<sup>-</sup> and Trop2<sup>-</sup>CD26<sup>+</sup> cells in PC3 or 22Rv1 cell line, respectively.
- S-T.** Quantitative RT-PCR analysis of Nanog downstream target genes from Trop2<sup>+</sup>CD26<sup>-</sup> and Trop2<sup>-</sup>CD26<sup>+</sup> cells in PC3 or 22Rv1 cell line, respectively. Data were presented as mean  $\pm$  S.D. (n=3).  $^{*}p<0.05$ ,  $^{*}p<0.01$  (*t*-test).
- U.** IB analysis of WCL derived from FACS-sorted PC3 cells infected with the indicated lentiviral shRNAs and selected with puromycin (1  $\mu$ g/ml) for 3 days.
- V-W.** The stable cell lines generated in (**U**) were performed for *in vitro* prostate sphere forming assays. Representative images (**V**) and quantification of sphere numbers per dish (**W**) were shown. Data were presented as mean  $\pm$  S.D. (n=3).  $^{*}p<0.01$ ,  $^{*}p<0.05$  (*t*-test).
- X.** The Aldh<sup>+</sup> cell population of stable cell lines generated in (**U**) were measured through detecting Aldh enzymatic activity and analyzed by flow cytometry. Data were presented as mean  $\pm$  S.D. (n=3).  $^{*}p<0.01$ ,  $^{*}p<0.05$  (*t*-test).

**Figure S2**

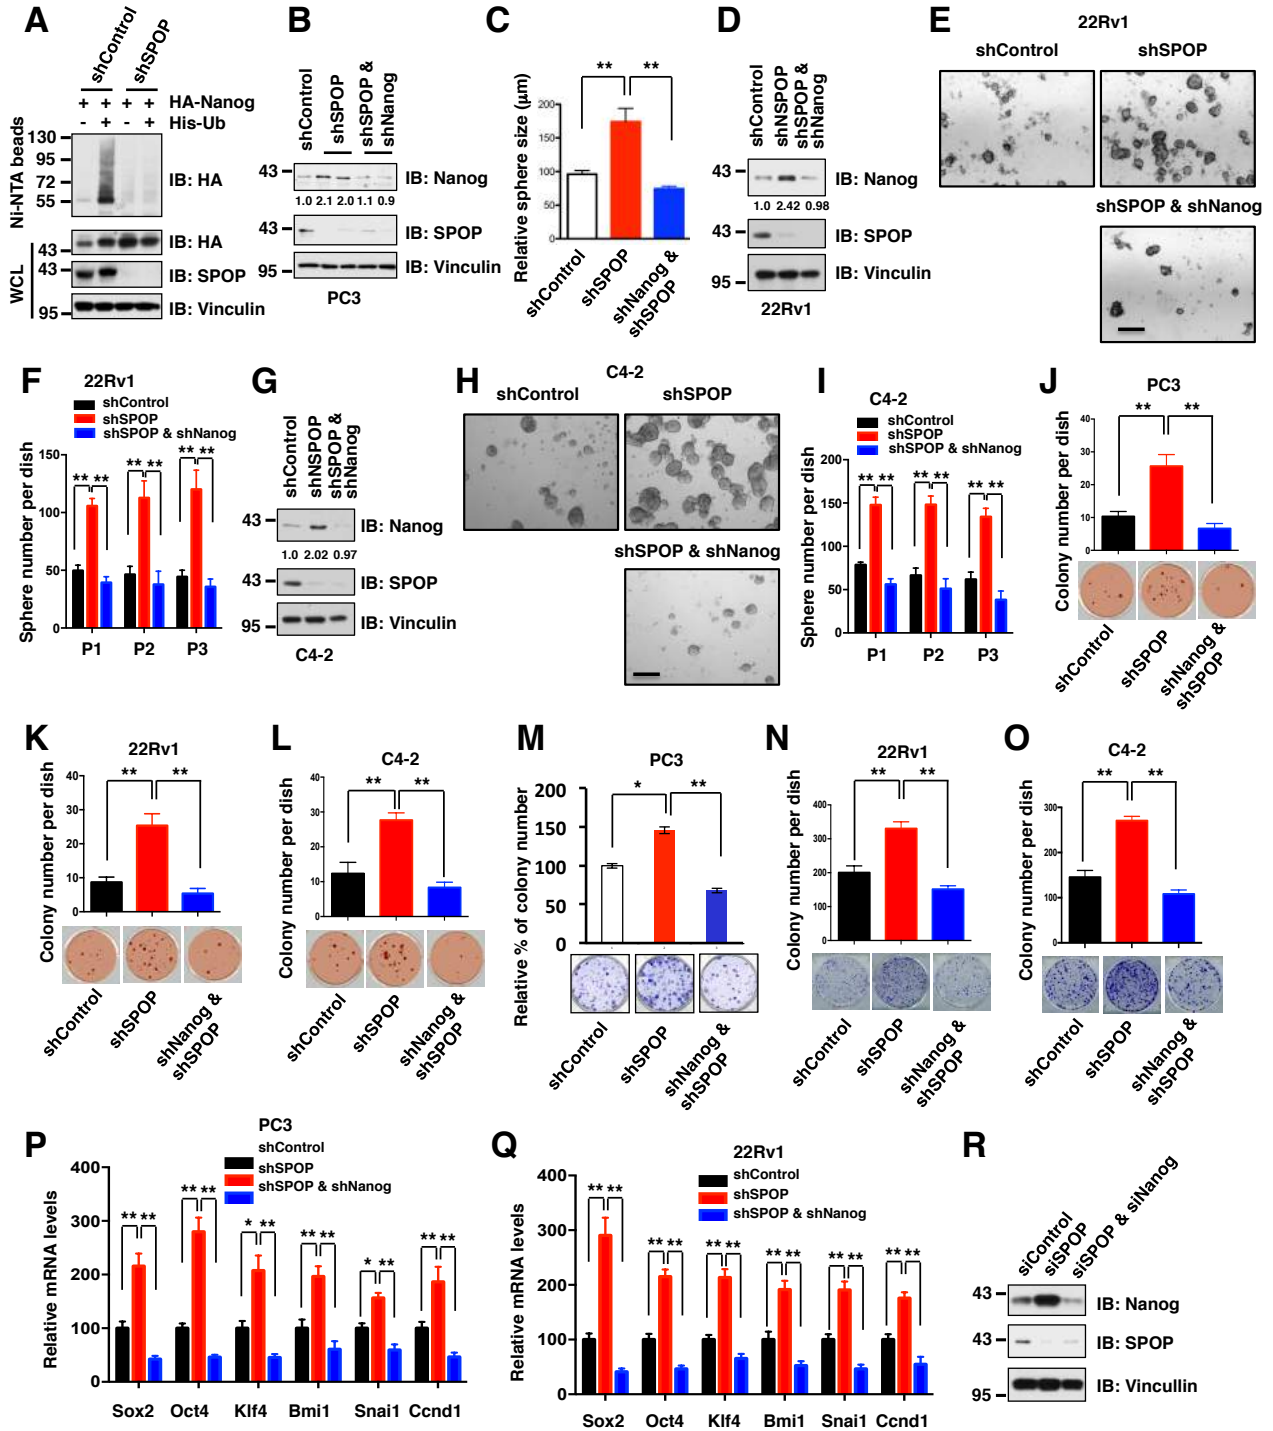

**Figure S2: Depletion of *SPOP* stabilizes Nanog to promote prostate cancer stem cell properties. (related to Figure 2).**

- A.** Immunoblot (IB) analysis of whole cell lysates (WCL) and Ni-NTA pull-down products derived from the lysates of PC3 cells transfected with the indicated constructs. Cells were treated with 30  $\mu$ M MG132 for 6 h before harvesting
- B.** IB analysis of WCL derived from PC3 cells infected with the indicated lentiviral shRNAs and selected with puromycin (1  $\mu$ g/ml) for 3 days. Nanog band intensities were quantified using ImageJ, normalized to corresponding Vinculin band intensities, and then normalized to shControl.
- C.** Quantification of sphere size in **Figure 2G** was showed. Data were presented as mean  $\pm$  S.D. (n=3). \* $p$ <0.01 ( $t$ -test).
- D and G.** IB analysis of WCL derived from 22Rv1 or C4-2 cells infected with the indicated lentiviral shRNAs and selected with puromycin (1  $\mu$ g/ml) for 3 days. Nanog band intensities were quantified using ImageJ, normalized to corresponding Vinculin band intensities, and then normalized to shControl.
- E-F.** 22Rv1 cells stably expressing indicated constructs were analyzed by *in vitro* prostate sphere forming assays. Representative images (**E**) and quantification of sphere numbers at different passages (**F**) were shown. The scale bar represents 50  $\mu$ m. Data were presented as mean  $\pm$  S.D. (n=3). \* $p$ <0.01 ( $t$ -test).
- H-I.** C4-2 cells stably expressing indicated constructs were analyzed by *in vitro* prostate sphere forming assays. Representative images (**H**) and quantification of sphere numbers at different passages (**I**) were shown. The scale bar represents 50  $\mu$ m. Data were presented as mean  $\pm$  S.D. (n=3). \* $p$ <0.01 ( $t$ -test).
- J-L.** Representative images and quantification of soft agar assays for PC3, 22Rv1 or C4-2 cells stably expressing indicated lentiviral shRNAs was shown. Data were presented as mean  $\pm$  S.D. (n=3).  $p$ <0.05, \*\* $p$ <0.01 ( $t$ -test).
- M-O.** Representative images and quantification of colony formation assays for PC3, 22Rv1 or C4-2 cells stably expressing indicated lentiviral shRNAs. Data were presented as mean  $\pm$  S.D. (n=3).  $p$ <0.05, \*\* $p$ <0.01 ( $t$ -test).
- P-Q.** Quantitative RT-PCR analysis of Nanog downstream target genes from PC3 or 22Rv1 cells stably expressing indicated lentiviral shRNAs. Data were presented as mean  $\pm$  S.D. (n=3).  $p$ <0.05, \*\* $p$ <0.01 ( $t$ -test).
- R.** IB analysis of WCL derived from CJ7 embryonic stem (ES) cells after 72 h transfection with the indicated siRNAs.



**Figure S3: Prostate cancer-associated SPOP mutants fail to bind and promote Nanog poly-ubiquitination and degradation (related to Figure 3).**

- A-B.** Immunoblot (IB) analysis of whole cell lysates (WCL) derived from 293T cells transfected with indicated constructs. 36 h post transfection, cells were treated with 100  $\mu\text{g/ml}$  cycloheximide (CHX) as indicated time points. Nanog protein abundance in (A) was quantified by ImageJ and plotted in (B).
- C.** IB of WCL and Ni-NTA pull-down products derived from the lysates of PC3 cells transfected with the indicated constructs. Cells were treated with 30  $\mu\text{M}$  MG132 for 6 h before harvesting.
- D.** IB of WCL derived from the lysates of PC3 cells infected with the indicated lentiviral constructs and selected with Hygromycin B (100  $\mu\text{g/ml}$ ) for 3 days.
- E-F.** IB analysis of WCL derived from 293T cells transfected with indicated constructs. 36 h post transfection, cells were treated with 100  $\mu\text{g/ml}$  cycloheximide (CHX) as indicated time points. Nanog protein abundance in (E) was quantified with ImageJ and plotted as indicated (F).
- G.** There is an observed positive correlation between gene expression changes in *SPOP* mutation and Nanog higher expression clinical specimens (See experimental procedures for details).
- H.** The *SPOP* mutation and Nanog higher expression clinical samples share common gene signatures. The Venn diagram shows the overlap of genes significantly differentially expressed in *SPOP* mutation and Nanog higher expression samples from TCGA.
- I.** A heatmap of the common genes associated with *SPOP* mutation and Nanog higher expression clinical samples. N represents matched normal samples from Nanog higher expression or *SPOP* mutation patients. T represents matched tumor samples from Nanog higher expression or *SPOP* mutation patients. The numbers represents TCGA patient IDs.



**Figure S4**

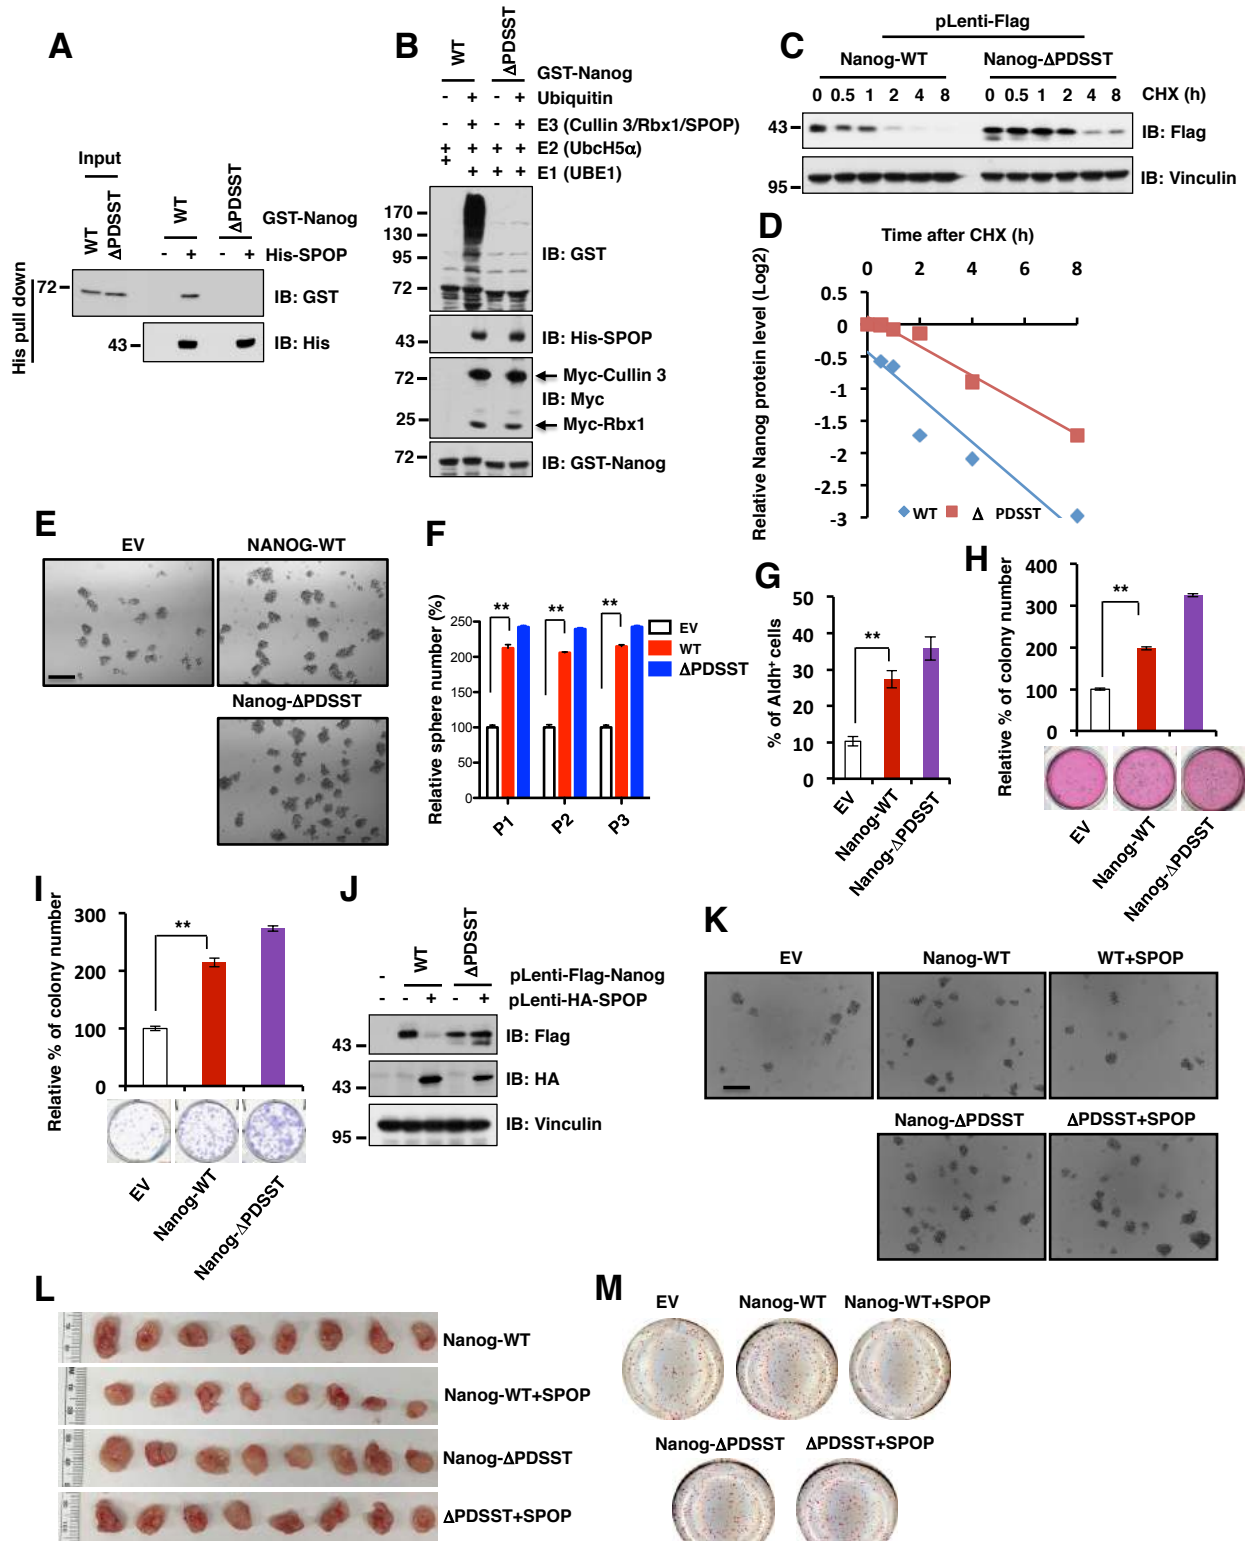

**Figure S4: SPOP promotes Nanog poly-ubiquitination and degradation in a degron-dependent manner (related to Figure 4).**

- A.** Immunoblot (IB) analysis of His pull-down precipitates from bacterially purified His-tagged recombinant SPOP protein incubated with bacterially purified GST-Nanog WT and mutant recombinant proteins.
- B.** IB analysis of *in vitro* ubiquitin assay for bacterially purified GST-Nanog WT and mutant recombinant proteins incubated with E1, E2, E3 and ubiquitin as indicated.
- C-D.** IB analysis of whole cell lysates (WCL) derived from PC3 cells stably expressing indicated lentiviral constructs. Cells were treated with 100  $\mu\text{g/ml}$  cycloheximide (CHX) as indicated time points. Nanog WT and deletion mutant ( $\Delta\text{PDSST}$ ) protein abundance in (C) was quantified by ImageJ and plotted in (D).
- E-F.** *In vitro* tumor sphere forming assays were performed for PC3 cells stably expressing Nanog-WT, Nanog- $\Delta\text{PDSST}$  as well as empty vector (EV) as control. Representative images (E) and quantification of sphere numbers at different passages (F) are shown. Data were presented as mean  $\pm$  S.D. (n=3).  $^{**}p<0.01$  (*t*-test).
- G.** The aldehyde dehydrogenase activity positive (Aldh<sup>+</sup>) cell population of PC3 cells stably expressing indicated constructs were measured through detecting Aldh enzymatic activity and analyzed by flow cytometry. Data were presented as mean  $\pm$  S.D. (n=3).  $^{**}p<0.01$  (*t*-test).
- H.** Representative images and quantification of soft agar assays for PC3 cells stably expressing indicated lentiviral constructs were shown. Data were presented as mean  $\pm$  S.D. (n=3).  $^{**}p<0.01$  (*t*-test).
- I.** Representative images and quantification of colony formation assays for PC3 cells stably expressing indicated lentiviral constructs were shown. Data were presented as mean  $\pm$  S.D. from three independent experiments.  $^{**}p<0.01$  (*t*-test).
- J.** IB analysis of WCL derived from PC3 cells infected with the indicated constructs and selected with hygromycin (250  $\mu\text{g/ml}$ ) for 3 days before harvesting.
- K.** Representative images of *In vitro* tumor sphere forming assays for PC3 cells stably cell lines generated in (J) were shown. The scale bar represents 50  $\mu\text{m}$ .
- L.** Tumor Xenograft mouse assays were performed and after 18 days post-injection, tumors were dissected after euthanizing the mice.
- M.** Alkaline Phosphatase (AP) staining was used to quantify the percentage of pluripotent CJ7 ES cells after 72 h transfection with indicated constructs. Representative images are shown.

**Figure S5**

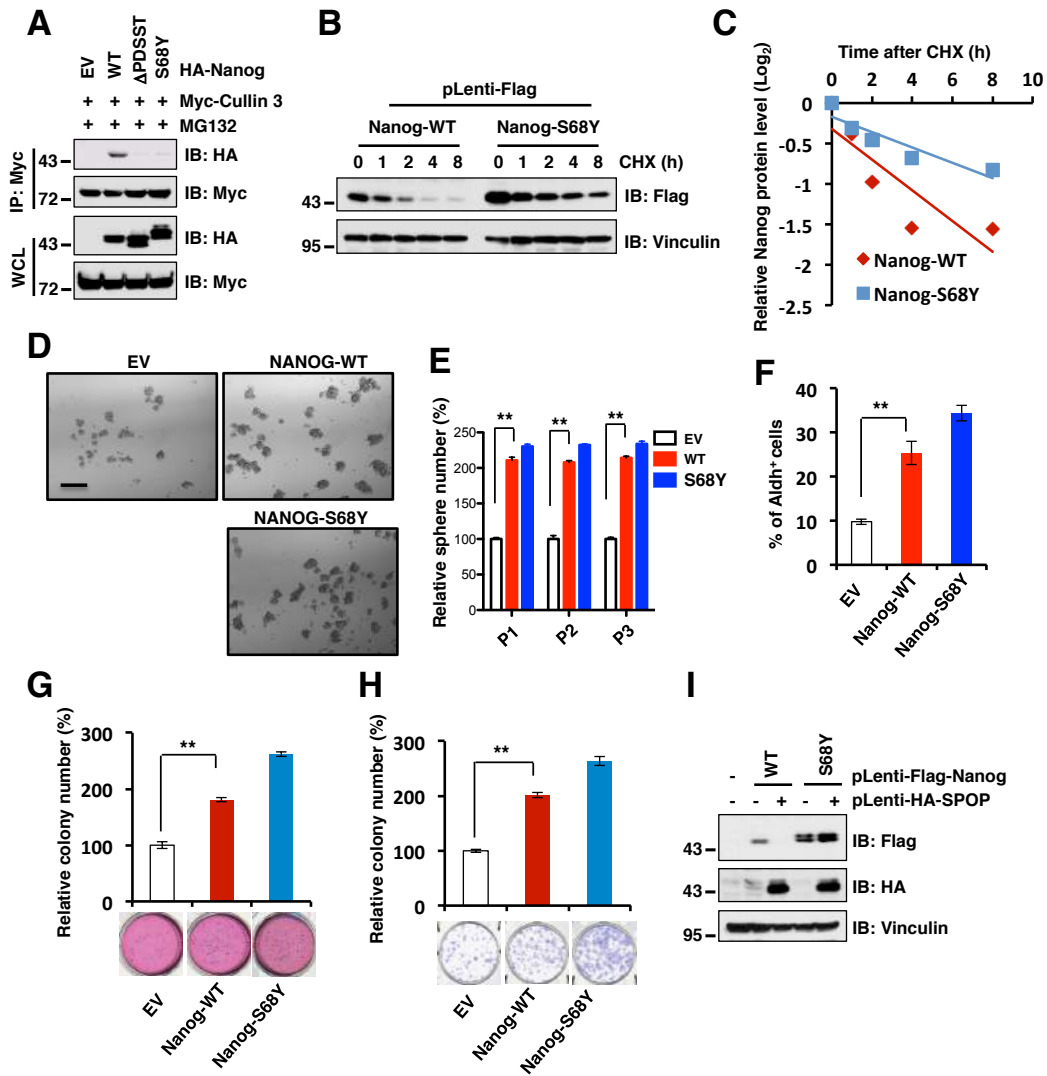

**Figure S5: Cancer patient-derived Nanog mutation (S68Y) in the degron motif confers resistance to SPOP-mediated destruction (related to Figure 5).**

- A.** Immunoblot (IB) analysis of whole cell lysates (WCL) and anti-Myc immunoprecipitations (IP) derived from 293 cells transfected with indicated constructs. Cells were treated with 10  $\mu$ M MG132 for 12 hours before harvesting.
- B-C.** Immunoblot (IB) analysis of whole cell lysates (WCL) and anti-Myc immunoprecipitations (IP) derived from 293 cells stably expressing indicated lentiviral construct. Cells were treated with 100  $\mu$ g/ml cycloheximide (CHX) as indicated time points. Nanog WT and S68Y mutant protein abundance in (B) was quantified by ImageJ and plotted in (C).
- D-E.** *In vitro* tumor sphere forming assays were performed for PC3 cells stably expressing Nanog-WT, Nanog-S68Y as well as empty vector (EV) as control. Representative images (D) and quantification of sphere numbers at different passages (E) are shown. The scale bar represents 50  $\mu$ m. Data were presented as mean  $\pm$  S.D. (n=3). \*\* $p$ <0.01 (*t*-test).
- F.** The aldehyde dehydrogenase activity positive (Aldh<sup>+</sup>) cell population of PC3 cells stably expressing indicated constructs were measured through detecting Aldh enzymatic activity and analyzed by flow cytometry. Data were presented as mean  $\pm$  S.D. (n=3). \*\* $p$ <0.01 (*t*-test).
- G.** Representative images and quantification of soft agar assays for cell lines stably expression of Nanog-WT, S68Y as well as EV were shown. Data were presented as mean  $\pm$  S.D. (n=3). \*\* $p$ <0.01 (*t*-test).
- H.** Representative images and quantification of colony formation assays for cell lines stably expression of Nanog-WT, S68Y as well as EV were shown. Data were presented as mean  $\pm$  S.D. (n=3). \*\* $p$ <0.01 (*t*-test).
- I.** IB analysis of WCL derived from PC3 cells infected with the indicated constructs and selected with hygromycin (250  $\mu$ g/ml) for 3 days before harvesting.

**Figure S6**

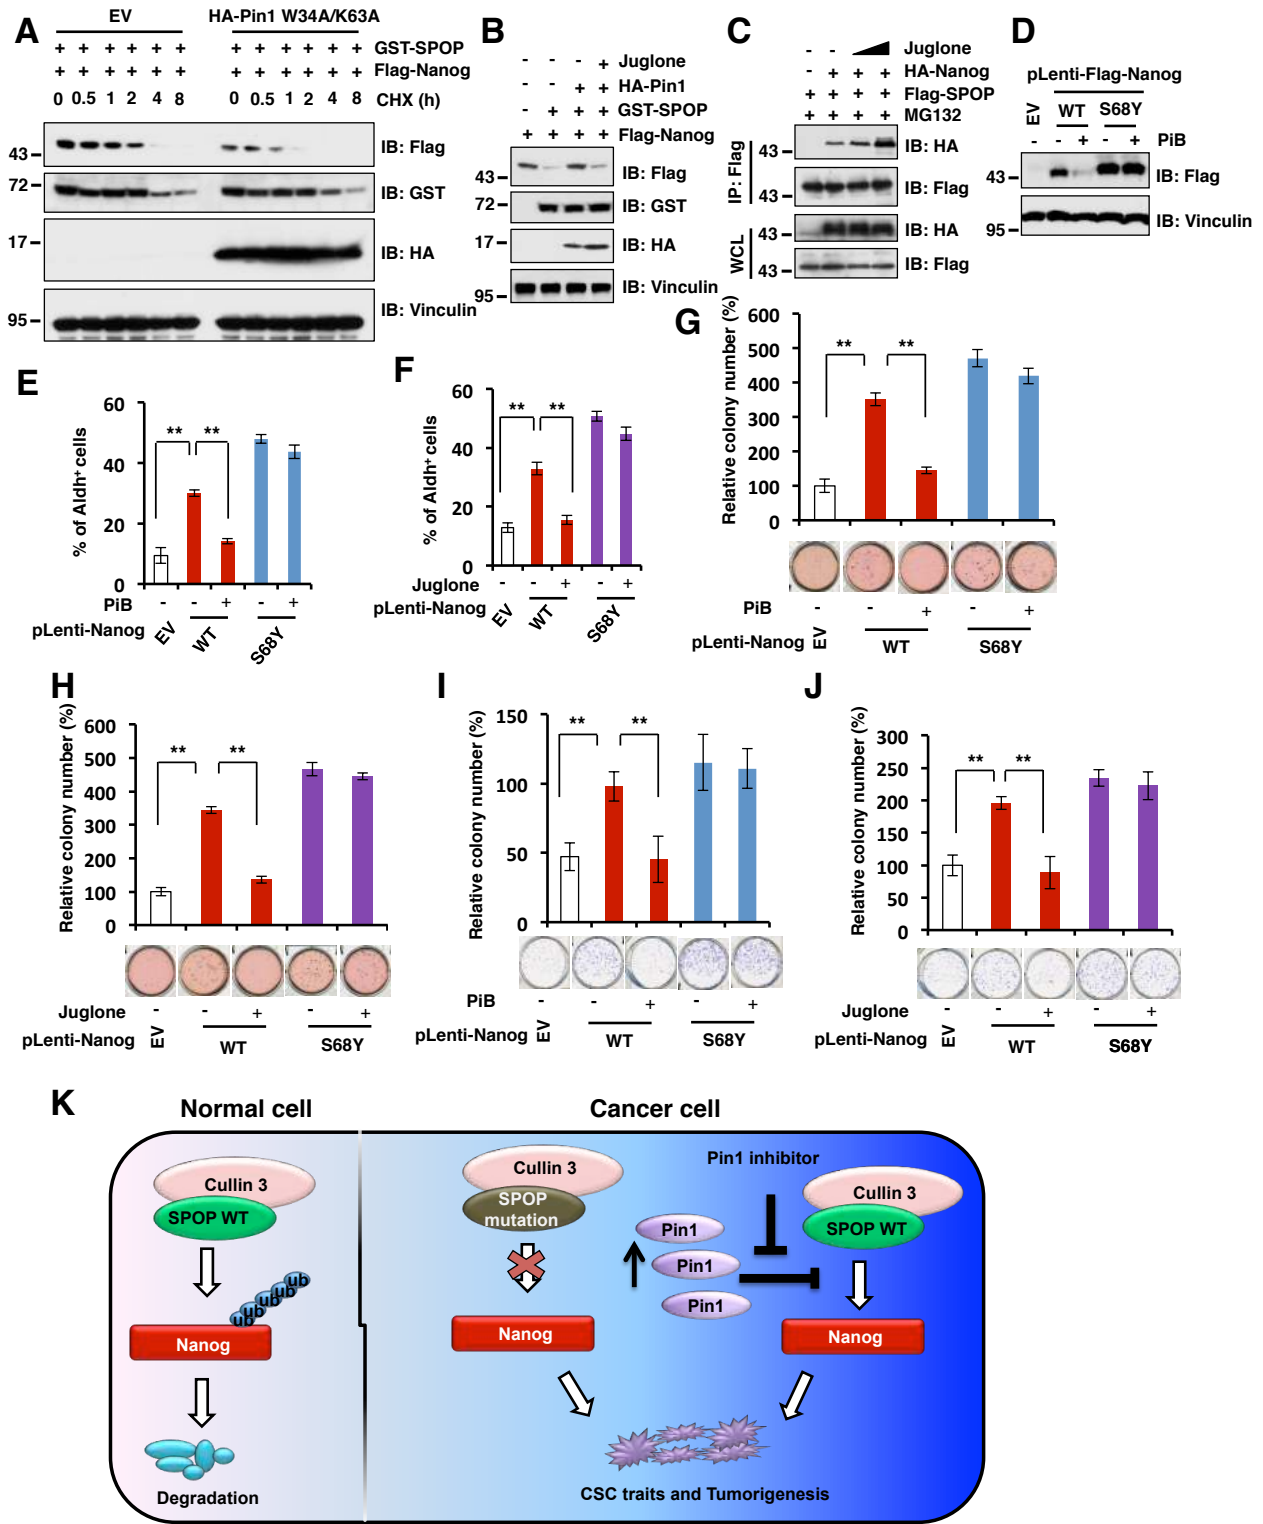

**Figure S6: Pin1 inhibitors promote SPOP-mediated destruction of Nanog to suppress prostate CSC traits (related to Figure 6).**

- A.** Immunoblot (IB) analysis of whole cell lysates (WCL) derived from 293T cells transfected with indicated constructs. 36 h post transfection, cells were treated with 100  $\mu$ g/ml cycloheximide (CHX) as indicated time points.
- B.** IB analyses of WCL from 293T cells transfected with indicated constructs and treated with Pin1 inhibitor (Juglone, 10  $\mu$ M) for 8 h before harvesting.
- C.** IB analyses of WCL and anti-Flag immunoprecipitations from 293T cells transfected with indicated constructs and were treated with MG132 (10  $\mu$ M) for 12 h and Juglone (10  $\mu$ M) for 8 h before harvesting.
- D.** IB analysis of WCL derived from PC3 cells stably expressing indicated constructs treated with the Pin1 inhibitor (PiB, 20  $\mu$ M) for 8 h.
- E-F.** PC3 cells stably expressing indicated constructs were treated with Pin1 inhibitors (2  $\mu$ M PiB or 1  $\mu$ M Juglone) for 3 days. Subsequently, cells were measured through detecting aldehyde dehydrogenase (Aldh) enzymatic activity and analyzed by flow cytometry. Data were presented as mean  $\pm$  S.D. (n=3).  $^{**}p<0.01$  (*t*-test).
- G-H.** Representative images and quantification of soft agar assays for cell lines generated in (D) was showed. The cells were treated with Pin1 inhibitors (2  $\mu$ M PiB or 1  $\mu$ M Juglone) for 3 days before seeding for soft agar assays. Data were presented as mean  $\pm$  S.D. (n=3).  $^{**}p<0.01$  (*t*-test).
- I-J.** Representative images and quantification of colony formation assays for cell lines generated in (D) was showed. The cells were treated with Pin1 inhibitors (2  $\mu$ M PiB or 1  $\mu$ M Juglone) for 3 days before seeding for colony formation assays. Data were presented as mean  $\pm$  S.D. (n=3).  $^{**}p<0.01$  (*t*-test).
- K.** A proposed working model to illustrate how SPOP regulates Nanog in normal and cancer cell setting.

**Table S1. Quantitative RT-PCR primer sequences (relates to STAR★METHODS).**

| <i>Gene</i>        | <i>Sequence</i>                                         |
|--------------------|---------------------------------------------------------|
| Human <i>Sox2</i>  | F: TGGACAGTTACGCGCACAT<br>R: CGAGTAGGACATGCTGTAGGT      |
| Human <i>Oct4</i>  | F: CTGGGTTGATCCTCGGACCT<br>R: CCATCGGAGTTGCTCTCCA       |
| Human <i>Klf4</i>  | F: CCCACATGAAGCGACTTCCC<br>R: CAGGTCCAGGAGATCGTTGAA     |
| Human <i>Bmi1</i>  | F: GCTGCCAATGGCTCTAATGAA<br>R: TGCTGGGCATCGTAAGTATCTT   |
| Human <i>Snai1</i> | F: ACTGCAACAAGGAATACCTCAG<br>R: GCACTGGTACTTCTTGACATCTG |
| Human <i>Ccnd1</i> | F: GCTGCGAAGTGGAACCATC<br>R: CCTCCTTCTGCACACATTTGAA     |
